# Supplementary material for: Threat of shock increases excitability and connectivity of the intraparietal sulcus
Source: eLife. 2017 May 30;6:e23608. doi: 10.7554/eLife.23608 (PMC5478270; doi:10.7554/eLife.23608)
Supplement: Figure 2—source data 1. — DOI: http://dx.doi.org/10.7554/eLife.23608.006 [file elife-23608-fig2-data1.xlsx]

## Sheet: startle_meg
	Startle MEG
	T-score
Safe	48.7883	0.260259
Threat	51.2508	0.260259
t-Test: Paired Two Sample for Means
	Variable 1	Variable 2	t(27) = 4.65; p = 0
Mean	51.2508	48.7883
Variance	2.04897	1.89037
Observations	28	28
Pearson Correlation	-0.997904
Hypothesized Mean Difference	0
df	27
t Stat	4.64557
P(T<=t) one-tail	3.94759e-05
t Critical one-tail	1.70329
P(T<=t) two-tail	7.89517e-05
t Critical two-tail	2.05183

## Sheet: rating_meg
	Rating MEG
	T-score
Safe	44.815	0.492849
Threat	54.8843	0.492849
t-Test: Paired Two Sample for Means
	Variable 1	Variable 2	t(27) = 10.03; p = 0
Mean	54.8843	44.815
Variance	6.83178	7.46268
Observations	28	28
Pearson Correlation	-0.974606
Hypothesized Mean Difference	0
df	27
t Stat	10.0313
P(T<=t) one-tail	6.63795e-11
t Critical one-tail	1.70329
P(T<=t) two-tail	1.32759e-10
t Critical two-tail	2.05183

## Sheet: rating_fmri
	Rating MRI
	T-score
Safe	42.8302	0.304909
Threat	57.1853	0.304909
t-Test: Paired Two Sample for Means
	Variable 1	Variable 2	t(24) = 23.06; p = 0
Mean	57.1853	42.8302
Variance	2.43076	2.4133
Observations	25	25
Pearson Correlation	-0.999224
Hypothesized Mean Difference	0
df	24
t Stat	23.0643
P(T<=t) one-tail	3.44419e-18
t Critical one-tail	1.71088
P(T<=t) two-tail	6.88838e-18
t Critical two-tail	2.0639

## Sheet: correlations
cross correlation
	startle_meg	rating_meg	rating_mri
startle_meg	1
rating_meg	0.628031	1
rating_mri	0.236927	0.265887	1
startle_meg/rating_meg
Regression Statistics
Multiple R	0.609499
R Square	0.371489
Adjusted R Square	0.347316
Standard Error	0.226601
Observations	28
ANOVA
	df	SS	MS	F	Significance F
Regression	1	0.7891	0.7891	15.3676	0.000575539
Residual	26	1.33505	0.0513482
Total	27	2.12415
	Coefficients	Standard Error	t Stat	P-value	Lower 95%	Upper 95%	Lower 95.0%	Upper 95.0%
Intercept	-0.0778419	0.0931053	-0.836063	0.410738	-0.269223	0.113539	-0.269223	0.113539
rating_meg	0.321858	0.0821034	3.92015	0.000575539	0.153092	0.490624	0.153092	0.490624
startle_meg/rating_mri
Regression Statistics
Multiple R	0.236927
R Square	0.0561342
Adjusted R Square	-0.00285739
Standard Error	0.294303
Observations	18
ANOVA
	df	SS	MS	F	Significance F
Regression	1	0.0824188	0.0824188	0.951563	0.343841
Residual	16	1.38583	0.0866142
Total	17	1.46825
	Coefficients	Standard Error	t Stat	P-value	Lower 95%	Upper 95%	Lower 95.0%	Upper 95.0%
Intercept	-0.179957	0.410223	-0.438681	0.666758	-1.04959	0.689677	-1.04959	0.689677
rating_mri	0.267301	0.27402	0.975481	0.343841	-0.313595	0.848198	-0.313595	0.848198
rating_meg/rating_mri
Regression Statistics
Multiple R	0.265887
R Square	0.0706958
Adjusted R Square	0.0126143
Standard Error	0.552346
Observations	18
ANOVA
	df	SS	MS	F	Significance F
Regression	1	0.371345	0.371345	1.21718	0.286232
Residual	16	4.88137	0.305086
Total	17	5.25272
	Coefficients	Standard Error	t Stat	P-value	Lower 95%	Upper 95%	Lower 95.0%	Upper 95.0%
Intercept	0.181893	0.769904	0.236254	0.816233	-1.45023	1.81402	-1.45023	1.81402
rating_mri	0.567383	0.514279	1.10326	0.286232	-0.522839	1.65761	-0.522839	1.65761
