# Supplementary material for: Threat of shock increases excitability and connectivity of the intraparietal sulcus
Source: eLife. 2017 May 30;6:e23608. doi: 10.7554/eLife.23608 (PMC5478270; doi:10.7554/eLife.23608)
Supplement: Figure 3—source data 1. — DOI: http://dx.doi.org/10.7554/eLife.23608.008 [file elife-23608-fig3-data1.xlsx]

## Sheet: Sheet1
	WB Connectivity
	Fisher Z
Safe	0.203242	0.00341503
Threat	0.218058	0.00341503
t-Test: Paired Two Sample for Means
	Variable 1	Variable 2
Mean	0.203242	0.218058
Variance	0.00500124	0.00578879
Observations	25	25
Pearson Correlation	0.889784
Hypothesized Mean Difference	0
df	24
t Stat	-2.12531
P(T<=t) one-tail	0.0220258
t Critical one-tail	1.71088
P(T<=t) two-tail	0.0440516
t Critical two-tail	2.0639
t(24) = -2.13; p = 0.044
