# Supplementary material for: Threat of shock increases excitability and connectivity of the intraparietal sulcus
Source: eLife. 2017 May 30;6:e23608. doi: 10.7554/eLife.23608 (PMC5478270; doi:10.7554/eLife.23608)
Supplement: Figure 4—source data 1. — DOI: http://dx.doi.org/10.7554/eLife.23608.011 [file elife-23608-fig4-data1.xlsx]

## Sheet: ws_error
	WB Connectivity
	Fisher Z
	Right Angular Gyrus
Safe	0.22894	0.00335851
Threat	0.258204	0.00335851
	WB Connectivity
	Fisher Z
	Safe		Threat
Right IPS	0.279057	0.00335851	0.305976	0.00335851
Left IPS	0.265068	0.00375347	0.296097	0.00375347
