# Supplementary material for: Threat of shock increases excitability and connectivity of the intraparietal sulcus
Source: eLife. 2017 May 30;6:e23608. doi: 10.7554/eLife.23608 (PMC5478270; doi:10.7554/eLife.23608)
Supplement: Figure 5—source data 1. — DOI: http://dx.doi.org/10.7554/eLife.23608.014 [file elife-23608-fig5-data1.xlsx]

## Sheet: ws_error
	PPC Connectivity
	Fisher Z
	Safe		Threat
L Thalamus	0.22379	0.00651212	0.295071	0.00651212
R IPL	0.267198	0.00445553	0.330855	0.00445553
L Sup Med Gy	0.236454	0.00512596	0.298998	0.00512596
L Precuneus	0.194411	0.00596265	0.26099	0.00596265
R MFG	0.300342	0.00371161	0.361154	0.00371161
L Angular Gy	0.297123	0.0043484	0.35756	0.0043484
L MFG	0.272942	0.00296134	0.325983	0.00296134
L MFG	0.27327	0.00328877	0.323512	0.00328877
