# Supplementary material for: Threat of shock increases excitability and connectivity of the intraparietal sulcus
Source: eLife. 2017 May 30;6:e23608. doi: 10.7554/eLife.23608 (PMC5478270; doi:10.7554/eLife.23608)
Supplement: Figure 6—source data 1. — DOI: http://dx.doi.org/10.7554/eLife.23608.016 [file elife-23608-fig6-data1.xlsx]

## Sheet: graphs
saf	thr				diff			ave
-61.0506	-61.0645	0.252884	0.239208	1	0.0139429	0.0484524	1	-61.0478	0.245331
-61.4313	-61.4392	0.198563	0.180216	1.5	0.00789989	0.0409509	1.5	-61.4292	0.189149
-61.9792	-62.0313	0.145613	0.134137	2	0.0521362	0.0288188	2	-62.0004	0.139929
-62.3388	-62.3681	0.134622	0.125855	2.5	0.0292999	0.01969	2.5	-62.3508	0.130211
-62.5306	-62.5493	0.132959	0.124347	3	0.0187004	0.0202917	3	-62.5371	0.128622
-62.7153	-62.7445	0.123979	0.117709	3.5	0.0292855	0.0161396	3.5	-62.7279	0.120808
-62.806	-62.8453	0.120639	0.110822	4	0.039232	0.016458	4	-62.8235	0.115844
-62.8833	-62.9307	0.109302	0.0979888	4.5	0.0473368	0.0203784	4.5	-62.9047	0.103764
-62.9136	-62.9491	0.114271	0.103103	5	0.0354708	0.0206147	5	-62.9295	0.10876
-62.926	-62.9628	0.119252	0.109383	5.5	0.0367407	0.0213796	5.5	-62.9425	0.114189
-62.9419	-62.9725	0.124548	0.11946	6	0.0306117	0.0209654	6	-62.9553	0.121588
-62.9558	-62.9923	0.127779	0.12396	6.5	0.0364207	0.0232226	6.5	-62.9715	0.125449
-62.9383	-62.9884	0.132913	0.131702	7	0.0501122	0.0239937	7	-62.9604	0.13175
-62.8964	-62.9629	0.143223	0.141586	7.5	0.0665441	0.031385	7.5	-62.925	0.141657
-62.8461	-62.9223	0.150773	0.151336	8	0.0761181	0.0348159	8	-62.8785	0.150083
-62.8158	-62.8844	0.15306	0.15187	8.5	0.0685669	0.0315245	8.5	-62.845	0.151814
-62.8015	-62.8678	0.146419	0.149794	9	0.0662229	0.0269842	9	-62.8304	0.147642
-62.8209	-62.8915	0.137914	0.141453	9.5	0.0705388	0.0222754	9.5	-62.853	0.139293
-62.8289	-62.8935	0.126738	0.13059	10	0.0646135	0.0242472	10	-62.858	0.128042
-62.8443	-62.9183	0.119625	0.122087	10.5	0.0739658	0.031567	10.5	-62.8766	0.119832
-62.9061	-62.9927	0.114361	0.114152	11	0.0865696	0.0357695	11	-62.9433	0.113095
-63.0076	-63.1034	0.112792	0.108967	11.5	0.0958583	0.0340197	11.5	-63.0487	0.110118
-63.1364	-63.2364	0.10806	0.104214	12	0.100056	0.02825	12	-63.181	0.105583
-63.2503	-63.3411	0.102816	0.0993881	12.5	0.090797	0.029126	12.5	-63.291	0.100453
-63.3423	-63.4263	0.101775	0.0959231	13	0.084061	0.0318467	13	-63.3794	0.098304
-63.4228	-63.4995	0.0994117	0.0927159	13.5	0.0766021	0.0284858	13.5	-63.457	0.0957879
-63.5109	-63.5681	0.0935471	0.093368	14	0.0571224	0.0245881	14	-63.5365	0.0930432
-63.6076	-63.6508	0.0852838	0.0894009	14.5	0.0431362	0.0191538	14.5	-63.6273	0.0869462
-63.6955	-63.7366	0.080585	0.0858611	15	0.0410608	0.0176158	15	-63.7139	0.0828865
-63.7491	-63.793	0.082806	0.0874283	15.5	0.043835	0.0168209	15.5	-63.7689	0.0847722
-63.766	-63.8174	0.0831437	0.0878101	16	0.0514026	0.0166229	16	-63.7894	0.0851968
-63.763	-63.8037	0.0853938	0.0927032	16.5	0.0406209	0.0175596	16.5	-63.7811	0.0887298
-63.7852	-63.8107	0.0868743	0.0924759	17	0.025438	0.0159854	17	-63.7965	0.0893952
-63.8253	-63.8434	0.0852927	0.0907077	17.5	0.0181284	0.0145226	17.5	-63.8334	0.0877451
-63.8818	-63.9099	0.0831156	0.0874921	18	0.0280226	0.0151555	18	-63.8947	0.0850348
-63.947	-63.978	0.0815184	0.0873253	18.5	0.0309729	0.0168728	18.5	-63.9609	0.0841617
-63.9777	-64.019	0.0831765	0.0874218	19	0.0412585	0.0177906	19	-63.9964	0.0850449
-63.9697	-64.0171	0.082838	0.0850852	19.5	0.0474042	0.0162832	19.5	-63.9912	0.0838055
-63.9544	-64.0096	0.084261	0.0870435	20	0.055118	0.0168836	20	-63.9794	0.0854446

## Sheet: Sheet1
	Frequency
	Hz
Individual Alpha Frequency	9.68072	0.217684
