# Supplementary material for: Threat of shock increases excitability and connectivity of the intraparietal sulcus
Source: eLife. 2017 May 30;6:e23608. doi: 10.7554/eLife.23608 (PMC5478270; doi:10.7554/eLife.23608)
Supplement: Figure 7—source data 1. — DOI: http://dx.doi.org/10.7554/eLife.23608.018 [file elife-23608-fig7-data1.xlsx]

## Sheet: sensor
	Power
	Log
Safe	-63.0217	0.0109872
Threat	-63.1006	0.0109872

## Sheet: source
	Power
	Log
Safe	-23.3709	0.00791022
Threat	-23.4499	0.00791022
